# Supplementary material for: Co-doped amorphous NiMoS4 modified with rGO for high-rate performance and long-cycling stability of hybrid supercapacitors
Source: Royal Society of Chemistry journal article supplement (doi:10.1039/d2dt02755k), 2022-01-01
Supplement: d2dt02755k1.pdf [file d2dt02755k1.pdf]

# Co-doped amorphous NiMoS<sub>4</sub> modified with rGO for high-rate and long-cycle stability of hybrid supercapacitor

Yuchen Lu,<sup>a</sup> Bingji Huang,<sup>a</sup> Jingjing Yuan<sup>\*a</sup>, Yifan Qiao,<sup>a</sup> Wenyao Zhang,<sup>b</sup> Guangyu He,<sup>a</sup>

Haiqun Chen<sup>\*a</sup>

(<sup>a</sup>Jiangsu Key Laboratory of Advanced Catalytic Materials and Technology, Advanced Catalysis and Green Manufacturing Collaborative Innovation Centre, Changzhou University, Changzhou, Jiangsu Province 213164, China;

<sup>b</sup>Key Laboratory for Soft Chemistry and Functional Materials of Ministry of Education, Nanjing University of Science and Technology, Nanjing, 210094, China)

\*Jingjing Yuan. E-mail: [yuanjj@cczu.edu.cn](mailto:yuanjj@cczu.edu.cn) \*Haiqun Chen. E-mail: [chenhq@cczu.edu.cn](mailto:chenhq@cczu.edu.cn)

## 1. Experimental section

### 1.1 Materials

(NH<sub>4</sub>)<sub>2</sub>S solution (16~20%), NH<sub>3</sub>·H<sub>2</sub>O (30~33%), (NH<sub>4</sub>)<sub>6</sub>Mo<sub>7</sub>O<sub>24</sub>·4H<sub>2</sub>O, Ni(NO<sub>3</sub>)<sub>2</sub>·6H<sub>2</sub>O, Co(NO<sub>3</sub>)<sub>2</sub>·6H<sub>2</sub>O, concentrated H<sub>2</sub>SO<sub>4</sub> (95~98%), KMnO<sub>4</sub>, KOH and polytetrafluoroethylene (PTFE) were purchased from Sinopharm Chemical Reagent Co., Ltd (China). Needle Coke (carbon content ≥ 98% and ash content ≤ 0.8%) was purchased from Jinzhou Petrochemical Co., Ltd (China). All reagents and solvents were of analytical grade and used as received.

### 1.2 Preparation of GO

Graphite oxide (GO) is prepared by a modified Hummers method.

### 1.3 Preparation of (NH<sub>4</sub>)<sub>2</sub>MoS<sub>4</sub>

The preparation method of (NH<sub>4</sub>)<sub>2</sub>MoS<sub>4</sub> has been improved on the basis of the work of our group<sup>1</sup>. 19.6 g of (NH<sub>4</sub>)<sub>6</sub>Mo<sub>7</sub>O<sub>24</sub>·4H<sub>2</sub>O were dissolved in 50 mL of ammonia water, and the pH of the ammonia water was adjusted to 9 using NH<sub>3</sub>·H<sub>2</sub>O. The solution was stirred in a water bath at 65 °C for 1 h after

---

340 mL of  $(\text{NH}_4)_2\text{S}$  solution was added. Following this, the solution was crystallized in an ice-water bath at  $0\text{ }^\circ\text{C}$  for 1 h. The resulting material was washed with deionized water and vacuum-dried for 12 h at  $60\text{ }^\circ\text{C}$  to give  $(\text{NH}_4)_2\text{MoS}_4$ .

#### 1.4 Preparation of $\text{Ni}_{1-x}\text{Co}_x\text{MoS}_4/\text{rGO}$ composite

The preparation process taking  $\text{Ni}_{0.7}\text{Co}_{0.3}\text{MoS}_4/\text{rGO}$  as an example is as follows: 0.13 g of  $(\text{NH}_4)_2\text{MoS}_4$  was dissolved in 20 mL of deionized water in a  $60\text{ }^\circ\text{C}$  water bath. At the same time, 0.102 g of  $\text{Ni}(\text{NO}_3)_2 \cdot 6\text{H}_2\text{O}$  and 0.044 g of  $\text{Co}(\text{NO}_3)_2 \cdot 6\text{H}_2\text{O}$  were added to 40 mL of GO dispersion with 16 mg dispersed in it, stirred at a constant speed for 10 min, and then sonicated for 20 min. Then the cooled  $(\text{NH}_4)_2\text{MoS}_4$  solution was slowly added dropwise to the above dispersion, stirred at a constant speed for 30 min, and reacted at  $120\text{ }^\circ\text{C}$  for 12 h. The samples were centrifuged three times with deionized water and then freeze-dried to obtain a black powder sample. A series of  $\text{Ni}_{1-x}\text{Co}_x\text{MoS}_4/\text{rGO}$  ( $x=0, 0.3, 0.5, 0.7$  and 1) composites were prepared by adjusting the molar ratio of nickel-cobalt metal salts. For comparison,  $\text{NiMoS}_4$  and  $\text{Ni}_{0.7}\text{Co}_{0.3}\text{MoS}_4$  were prepared under the same conditions without adding GO.

#### 1.5 Preparation of needle coke oxide (NCO)

1 g of the needle coke (NC) was slowly added to a beaker containing 25 mL of concentrated  $\text{H}_2\text{SO}_4$  under ice-water bath, and stirred for 1 h. Then 3 g of  $\text{KMnO}_4$  was slowly added in an ice-water bath and kept stirring for 12 h at room temperature. After that, 60 mL of deionized water was slowly added to the above mixture, stirring for 12 h at  $60\text{ }^\circ\text{C}$ . Finally, the product was rinsed to neutrality with deionized water and dried at  $60\text{ }^\circ\text{C}$  in oven, named as NCO.

#### 1.6 Materials characterization

The crystalline phase was investigated by powder X-ray diffraction (XRD, Bruker D8 Advance with  $\text{Cu K}\alpha$  radiation,  $\lambda = 0.15418\text{ nm}$ ). The specific surface area was obtained from the  $\text{N}_2$  adsorption-

---

desorption isotherms and calculated by the Brunauer-Emmett-Teller method (BET, ASAP2460). The chemical species and structure of samples were examined by X-ray photoelectron spectroscopy (XPS, Thermo Scientific K-Alpha) and Fourier transform infrared spectroscopy (FT-IR, Nicolet Avatar 370). The morphology of samples was observed by field-emission scanning electron microscopy (FESEM, Zeiss Supra 55) equipped with an energy dispersive spectrometer (EDS) and transmission electron microscopy (TEM, JEOL JEM-2100).

### 1.7 Electrochemical measurements

Electrochemical studies were conducted using three-electrode and two-electrode systems. Acetylene black and polytetrafluoroethylene (PTFE) were used as the conductive component and binder, respectively. The active material, acetylene black, and PTFE were uniformly mixed in an 8:1:1 mass ratio, and the resulting slurry was uniformly coated on a porous NF substrate with a 1 cm×1 cm area. The mass of the active ingredient is approximately 1.2 mg. As the electrolyte, a KOH solution of 6 mol L<sup>-1</sup> was used. The platinum rod and the Hg/HgO electrode serve as the counter and reference electrodes in the three-electrode test, respectively. For the two-electrode test, a CR2032 battery box was used, and glass fiber filter paper was used as a separator to construct a two-electrode symmetrical button capacitor. The cyclic voltammetry (CV) and galvanostatic charge-discharge (GCD) tests of the samples were performed using the CHI 760E electrochemical workstation of Shanghai Chenhua Company. All electrochemical tests were performed at room temperature.

The specific capacitance  $C$  (C·g<sup>-1</sup>) of the three-electrode system was calculated using the equation<sup>2</sup>:

$$C = \frac{I\Delta t}{m} \quad (1)$$

where  $m$  is the weight of the active material,  $\Delta t$  is the discharge duration,  $I$  is the discharge current.

The following equations are used to compute the power density  $P$  (W·kg<sup>-1</sup>) and energy density  $E$  (Wh·kg<sup>-1</sup>) of the HSC<sup>3</sup>:

$$E = \frac{CAV}{7.2} \quad (2)$$

$$P = \frac{3600E}{\Delta t} \quad (3)$$

where  $C$  represents the specific capacitance of the HSC ( $C \cdot g^{-1}$ ), and  $\Delta V$  and  $\Delta t$  are equivalent to those in equations (1).

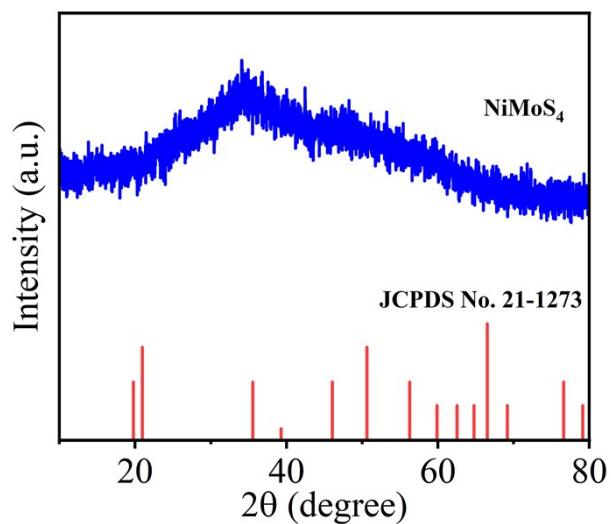

Fig. S1 XRD spectra of  $NiMoS_4$  and standard card

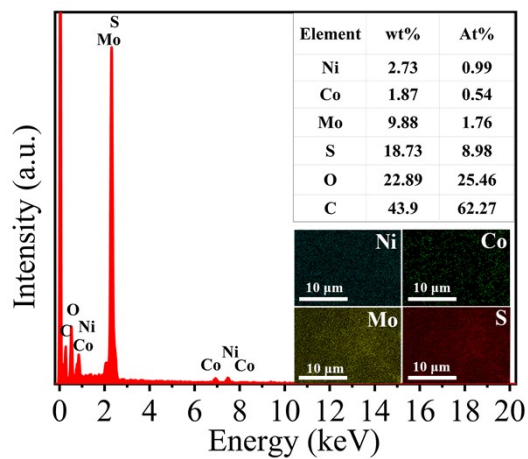

Fig. S2 The EDS spectra of  $Ni_{0.7}Co_{0.3}MoS_4/rGO$  (the inset shows the Ni, Co, Mo and S elemental mappings).

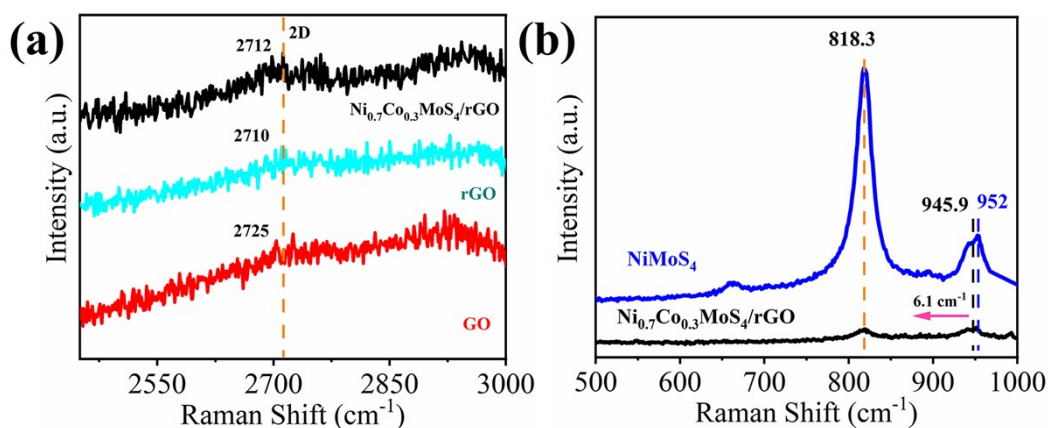

Fig. S3 (a) Amplified Raman spectra of GO, RGO and  $\text{Ni}_{0.7}\text{Co}_{0.3}\text{MoS}_4/\text{rGO}$  from 2450  $\text{cm}^{-1}$  to 3000  $\text{cm}^{-1}$ , (b) Amplified Raman spectra of  $\text{NiMoS}_4$  and  $\text{Ni}_{0.7}\text{Co}_{0.3}\text{MoS}_4/\text{rGO}$  from 500  $\text{cm}^{-1}$  to 1000  $\text{cm}^{-1}$

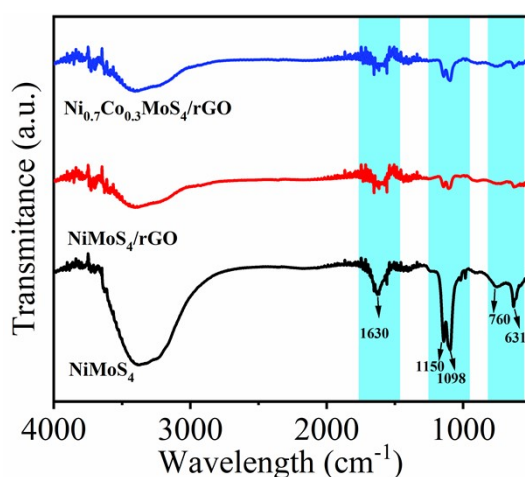

Fig. S4 FT-IR spectra of  $\text{NiMoS}_4$ ,  $\text{NiMoS}_4/\text{rGO}$  and  $\text{Ni}_{0.7}\text{Co}_{0.3}\text{MoS}_4/\text{rGO}$

Fig. S4 clearly shows that rGO has weak absorption bands at 1630, 1403, 1150 and 1098  $\text{cm}^{-1}$ , which is caused by functional groups such as -OH, -O and -OOH on the surface.<sup>4</sup> In addition, the tensile vibration peaks of Ni-S and Mo-S appeared at 760 and 631  $\text{cm}^{-1}$  respectively.<sup>5</sup> With the introduction of Co, the Ni-S and Mo-S peak intensities of the  $\text{Ni}_{0.7}\text{Co}_{0.3}\text{MoS}_4/\text{rGO}$  curve are also weakened. These results indicate that  $\text{NiMoS}_4$  and  $\text{Ni}_{0.7}\text{Co}_{0.3}\text{MoS}_4/\text{rGO}$  were successfully prepared.

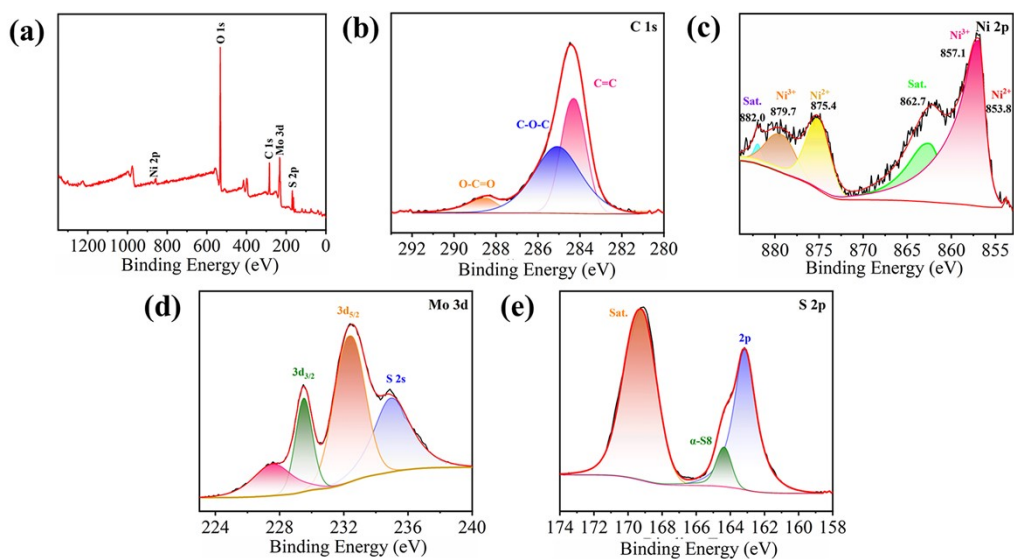

Fig. S5 (a) XPS survey spectrum of NiMoS<sub>4</sub>/rGO. Core XPS spectrum of (b) C 1s, (c) Ni 2p, (d) Mo 3d and (e) S 2p XPS spectra of NiMoS<sub>4</sub>/rGO

The Ni 2p spectrum of NiCoMoS<sub>4</sub>/rGO can be fitted into the satellite peaks (862.7 and 882.0 eV), corresponding to Ni<sup>3+</sup> (879.7 and 857.1 eV) and Ni<sup>2+</sup> (875.4 and 853.8 eV) characteristic peaks. The above data can prove that compared with NiMoS<sub>4</sub>/rGO, the Ni characteristic peaks of Ni<sub>0.7</sub>Co<sub>0.3</sub>MoS<sub>4</sub>/rGO generally have obvious red shift.

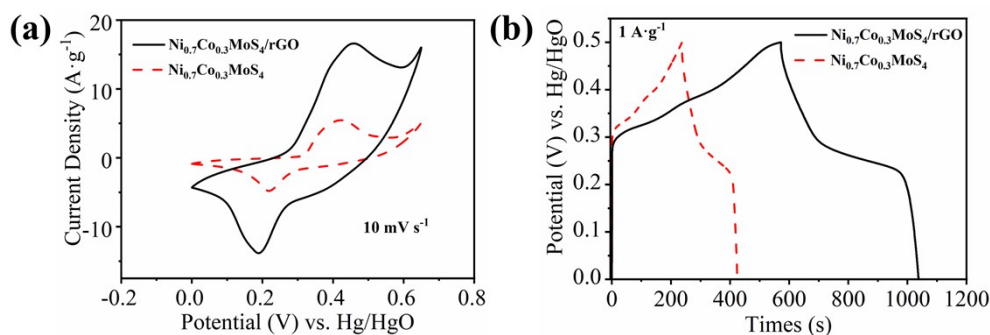

Fig. S6 CV (a) and GCD (b) curves of Ni<sub>0.7</sub>Co<sub>0.3</sub>MoS<sub>4</sub> and Ni<sub>0.7</sub>Co<sub>0.3</sub>MoS<sub>4</sub>/rGO.

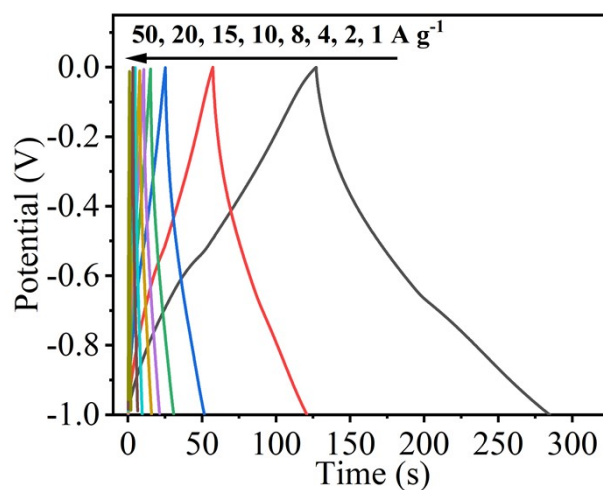

Fig. S7 GCD curves of NCO in different current density.

Table S1 Comparison of electrochemical performance of Ni<sub>0.7</sub>Co<sub>0.3</sub>MoS<sub>4</sub>/rGO (three-electrode system) with reported transition metal-based sulfides electrode in literatures

| Electrode material                                                    | Specific capacity                                   | References       |
|-----------------------------------------------------------------------|-----------------------------------------------------|------------------|
| <b>Ni<sub>0.7</sub>Co<sub>0.3</sub>MoS<sub>4</sub>/rGO</b>            | <b>509.8 C·g<sup>-1</sup> at 1 A·g<sup>-1</sup></b> | <b>This work</b> |
| Amorphous CoMoS <sub>4</sub>                                          | 396.6 C·g <sup>-1</sup> at 1 A·g <sup>-1</sup>      | 6                |
| Amorphous structured NiMoS <sub>4</sub> -rGO                          | 500 C·g <sup>-1</sup> at 1 A·g <sup>-1</sup>        | 7                |
| NiCo <sub>2</sub> S <sub>4</sub> nanotube                             | 397 C·g <sup>-1</sup> at 1 A·g <sup>-1</sup>        | 8                |
| NiCo <sub>2</sub> O <sub>4</sub> flowerlike nanostructure             | 361.9 C·g <sup>-1</sup> at 1 A·g <sup>-1</sup>      | 9                |
| NiCo <sub>2</sub> S <sub>4</sub> @MnO <sub>2</sub> heterostructure    | 286.4 C·g <sup>-1</sup> at 1 A·g <sup>-1</sup>      | 10               |
| NiCo <sub>2</sub> S <sub>4</sub> cubic octahedron                     | 334 C·g <sup>-1</sup> at 1 A·g <sup>-1</sup>        | 11               |
| rGO <sub>100</sub> -CNT <sub>50</sub> -Co <sub>3</sub> S <sub>4</sub> | 488.6 C·g <sup>-1</sup> at 1 A·g <sup>-1</sup>      | 12               |
| Ni <sub>3</sub> S <sub>4</sub> -MoS <sub>2</sub> nano flower          | 490.8 C·g <sup>-1</sup> at 1 A·g <sup>-1</sup>      | 13               |
| MOF-derived Co <sub>9</sub> S <sub>8</sub> /carbon                    | 367 C·g <sup>-1</sup> at 1 A·g <sup>-1</sup>        | 14               |
| Co <sub>3</sub> O <sub>4</sub> -rGO                                   | 330 C·g <sup>-1</sup> at 0.5 A·g <sup>-1</sup>      | 15               |

Table S2 Rate performance of NiMoS<sub>4</sub>/rGO, Ni<sub>0.7</sub>Co<sub>0.3</sub>MoS<sub>4</sub>/rGO, Ni<sub>0.5</sub>Co<sub>0.5</sub>MoS<sub>4</sub>/rGO, Ni<sub>0.3</sub>Co<sub>0.7</sub>MoS<sub>4</sub>/rGO and CoMoS<sub>4</sub>/rGO

| Electrode material                                        | Capacitance in 1 A·g <sup>-1</sup> (C·g <sup>-1</sup> ) | Capacitance in 20 A·g <sup>-1</sup> (C·g <sup>-1</sup> ) | Capacitance retention (%) |
|-----------------------------------------------------------|---------------------------------------------------------|----------------------------------------------------------|---------------------------|
| NiMoS <sub>4</sub> /rGO                                   | 114.1                                                   | 36                                                       | 31                        |
| Ni <sub>0.7</sub> Co <sub>0.3</sub> MoS <sub>4</sub> /rGO | 509.8                                                   | 260.3                                                    | 51                        |
| Ni <sub>0.5</sub> Co <sub>0.5</sub> MoS <sub>4</sub> /rGO | 312                                                     | 76.8                                                     | 24.6                      |
| Ni <sub>0.3</sub> Co <sub>0.7</sub> MoS <sub>4</sub> /rGO | 140                                                     | 34.6                                                     | 24.7                      |
| CoMoS <sub>4</sub> /rGO                                   | 370                                                     | 23.8                                                     | 6.4                       |

#### Reference

1. B. Huang, J. Yuan, Y. Lu, Y. Zhao, X. Qian, H. Xu, G. He and H. Chen, *Chem. Eng. J.*, 2022, 436.
2. B. Huang, D. Yao, J. Yuan, Y. Tao, Y. Yin, G. He and H. Chen, *J. Colloid Interface Sci.*, 2022, 606, 1652-1661.
3. H. Peng, B. Yao, X. Wei, T. Liu, T. Kou, P. Xiao, Y. Zhang and Y. Li, *Advanced Energy Materials*, 2019, 9.
4. X. Zhao, M. Chen, H. Wang, L. Xia, M. Guo, S. Jiang, Q. Wang, X. Li and X. Yang, *Mater Sci Eng C Mater Biol Appl*, 2020, 116, 111221.
5. J. Xu, X. Yang, Y. Zou, L. Zhu, F. Xu, L. Sun, C. Xiang and J. Zhang, *J. Alloys Compd.*, 2022, 891.
6. X. Xu, Y. Song, R. Xue, J. Zhou, J. Gao and F. Xing, *Chem. Eng. J.*, 2016, 301, 266-275.
7. M. Wei, X. Wu, Y. Yao, S. Yu, R. Sun and C. Wong, *ACS Sustainable Chemistry & Engineering*, 2019, 7, 19779-19786.



- 
8. H. Wang, M. Liang, Z. He, Z. Guo, Y. Zhao, K. Li, W. Song, Y. Zhang, X. Zhang, Y. Zhao and Z. Miao, *Current Applied Physics*, 2022, 35, 7-15.
  9. H. Chen, J. Jiang, L. Zhang, T. Qi, D. Xia and H. Wan, *J. Power Sources*, 2014, 248, 28-36.
  10. H. Chen, X. L. Liu, J. M. Zhang, F. Dong and Y. X. Zhang, *Ceram. Int.*, 2016, 42, 8909-8914.
  11. S. Hussain, T. Liu, N. Aslam, Y. Zhang and S. Zhao, *Mater. Lett.*, 2017, 189, 21-24.
  12. A. Mohammadi, N. Arsalani, A. G. Tabrizi, S. E. Moosavifard, Z. Naqshbandi and L. S. Ghadimi, *Chem. Eng. J.*, 2018, 334, 66-80.
  13. W. Luo, G. Zhang, Y. Cui, Y. Sun, Q. Qin, J. Zhang and W. Zheng, *Journal of Materials Chemistry A*, 2017, 5, 11278-11285.
  14. S. Zhang, D. Li, S. Chen, X. Yang, X. Zhao, Q. Zhao, S. Komarneni and D. Yang, *Journal of Materials Chemistry A*, 2017, 5, 12453-12461.
  15. L. Xie, F. Su, L. Xie, X. Li, Z. Liu, Q. Kong, X. Guo, Y. Zhang, L. Wan, K. Li, C. Lv and C. Chen, *ChemSusChem*, 2015, 8, 2917-2926.
